# Supplementary material for: Inflammation-Responsive Nanovalves of Polymer-Conjugated Dextran on a Hole Array of Silicon Substrate for Controlled Antibiotic Release
Source: MDPI journal article supplement (doi:10.3390/polym14173611), 2022-09-01
Supplement: s1 [file s1]

# Inflammation-Responsive Nanovalves of Polymer-Conjugated Dextran on a Hole Array of Silicon Substrate for Controlled Antibiotic Release

Ai-Wei Lee <sup>1,2</sup>, Pao-Lung Chang <sup>1</sup>, Shien-Kuei Liaw <sup>3</sup>, Chien-Hsing Lu <sup>4,5,\*</sup> and Jem-Kun Chen <sup>2,\*</sup>

<sup>1</sup> Department of Anatomy and Cell Biology, School of Medicine, College of Medicine, Taipei Medical University, Taipei 106, Taiwan

<sup>2</sup> Department of Materials and Science Engineering, National Taiwan University of Science and Technology, Taipei 10607, Taiwan

<sup>3</sup> Department of Electronic and Computer Engineering, National Taiwan University of Science and Technology, Taipei 10607, Taiwan

<sup>4</sup> Department of Obstetrics and Gynecology, Taichung Veterans General Hospital, Taichung 40705, Taiwan

<sup>5</sup> Ph.D. Program in Translational Medicine, Institute of Biomedical Sciences, Rong-Hsing Research Center for Translational Medicine, National Chung-Hsing University, Taichung 40227, Taiwan

\* Correspondence: chlu@vghc.gov.tw (C.-H.L.); jkchen@mail.ntust.edu.tw (J.-K.C.); Tel.: +886-2-27376523 (J.-K.C.); Fax: +886-2-27376544 (J.-K.C.)

(a)

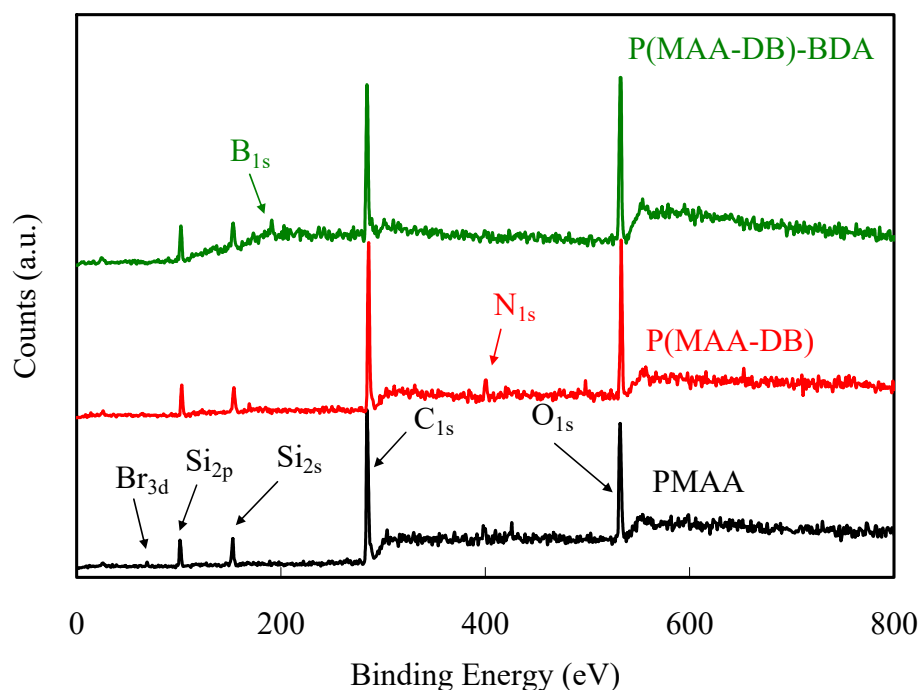

(b)

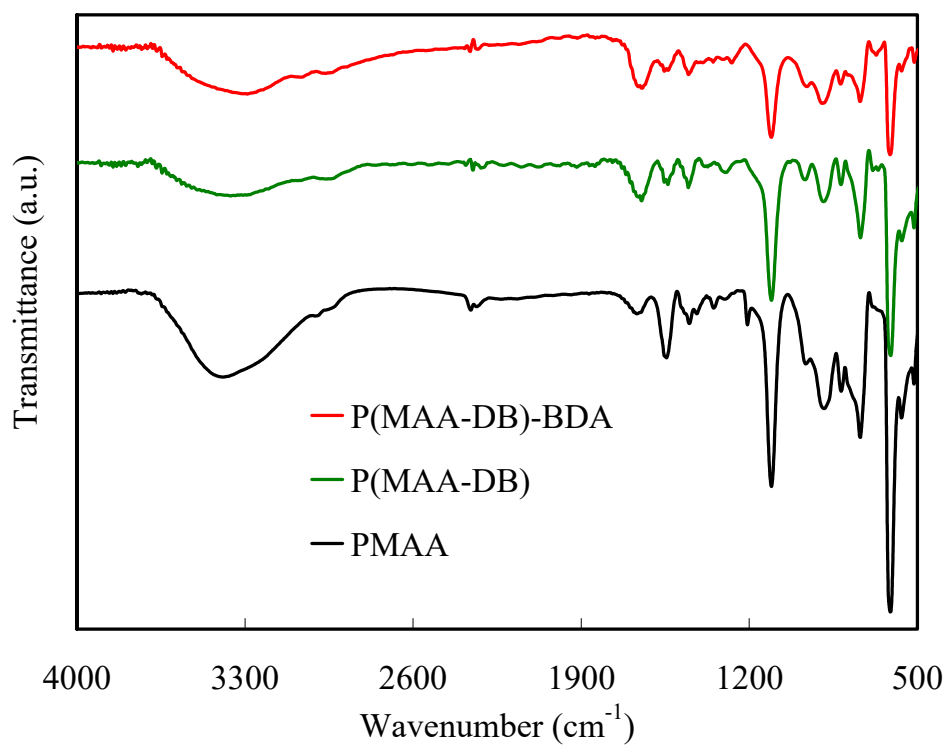

**Figure S1.** (a) XPS survey spectra and (b) FTIR spectra of 500H-PMAA, 500H-P(MAA-DB), and 500H-P(MAA-DB)-BDA.
